# Supplementary material
Source: PubMed Central journal article supplement (PMC3655534)
Supplement: NIHMS307881-supplement-01.pdf [file NIHMS307881-supplement-01.pdf]

## Supplemental Information

**Table S1.** fMRI Study Sample Description: Comparison with Mothers not Selected for fMRI Study

| Variable             | fMRI Study ( <i>n</i> = 22)  | Non-fMRI Study ( <i>n</i> = 80) | Difference                      |
|----------------------|------------------------------|---------------------------------|---------------------------------|
|                      | M (SD)<br>Range              | M (SD)<br>Range                 |                                 |
| Cortisol - Intercept | -2.21 (.69)<br>-2.97 to -.40 | -1.32 (1.00)<br>-3.00 to .80    | $t(100) = 3.95,$<br>$p < .001$  |
| Cortisol - Slope     | -.16 (.10)<br>-.31 to .10    | -.10 (.17)<br>-.47 to .33       | $t(100) = 1.64,$<br>$p = .11$   |
| Cortisol - Quadratic | .005 (.05)<br>-.14 to .07    | -.05 (.07)<br>-.20 to .11       | $t(100) = -3.46,$<br>$p = .001$ |

(Demographic and psychological variables showed *ns* group differences)

Differences between mothers selected for the fMRI study vs. those not selected suggest current findings are based on a relatively milder sample of HPA reactivity that could dilute, but probably not inflate, estimated differences in neural response.

**Table S2.** Associations among Maternal Depression, HPA, and Neural Response Measures

| Depression Measure                            | Association with HPA Terms                                                                      | Association with Neural Response (own cry>control sound) | Effect on HPA-Neural Response Associations                                                                                                                                                                                                                                                                                                                                                  |
|-----------------------------------------------|-------------------------------------------------------------------------------------------------|----------------------------------------------------------|---------------------------------------------------------------------------------------------------------------------------------------------------------------------------------------------------------------------------------------------------------------------------------------------------------------------------------------------------------------------------------------------|
| Diagnostic Criteria (during perinatal period) |                                                                                                 |                                                          |                                                                                                                                                                                                                                                                                                                                                                                             |
| Major Depressive Disorder vs. No Diagnosis    | <i>ns</i> group differences                                                                     | Reduced thalamostriatal response (see 1)                 | <i>ns</i>                                                                                                                                                                                                                                                                                                                                                                                   |
| Self-Reported (current) Symptoms              |                                                                                                 |                                                          |                                                                                                                                                                                                                                                                                                                                                                                             |
| CES-D Score                                   | $r = .27$ with intercept<br>$r = .14$ with slope<br><b><math>r = -.48</math></b> with quadratic | Reduced prefrontal, thalamostriatal response (see 1)     | Same activations remain (size reduced – see below for changes in representative cortisol quadratic-related clusters)<br>ACC: 6441 to 2336 mm <sup>3</sup><br>PAG-Cerebellum: 10758 (1 cluster) to 1459 and 3027 mm <sup>3</sup> (2 clusters)<br>L Insula-OFC: 6580 to 3130 mm <sup>3</sup><br>R Insula-OFC: 8066 to 1296 mm <sup>3</sup><br>L Supramarginal G: 5571 to 4738 mm <sup>3</sup> |

ACC, anterior cingulate cortex; CES-D, Center for Epidemiologic Studies Depression scale; G, gyrus; HPA, hypothalamic-pituitary-adrenal; L, left; OFC, orbitofrontal cortex; PAG, periaqueductal gray; R, right.

Bolded value indicates  $p < .05$ .

1. Laurent HK, Ablow JC (2011): A cry in the dark: Depressed mothers show reduced neural response to their own infant's cry. *Soc Cogn Affect Neurosci*. Epub Jan 5, 2011: doi: 10.1093/scan/nsq091.
